# Supplementary material for: Highly efficient broadband NIR phosphor Y2CaHfScAl3O12:Cr3+,Yb3+ with superior thermal stability for spectroscopy applications
Source: Royal Society of Chemistry journal article supplement (doi:10.1039/d3tc00634d), 2023-01-01
Supplement: d3tc00634d1.pdf [file d3tc00634d1.pdf]

**Highly efficient broadband NIR phosphor  $\text{Y}_2\text{CaHfScAl}_3\text{O}_{12}:\text{Cr}^{3+}, \text{Yb}^{3+}$   
with superior thermal stability for spectroscopy applications**

Pengcheng Luo <sup>a,b</sup>, Dashuai Sun <sup>\*b</sup>, Zeyu Lyu <sup>b</sup>, Sida Shen <sup>b</sup>, Zheng Lu <sup>b</sup>, Zhijun Li <sup>a,b</sup>,  
Zhihang Yue <sup>b</sup>, Chengliang Lyu <sup>b</sup>, and Hongpeng You <sup>\*a, b, c</sup>

<sup>a</sup> School of Chemistry and Chemical Engineering, Nanchang University, Nanchang  
330031, P.R. China

<sup>b</sup> Ganjiang Innovation Academy, Chinese Academy of Sciences, Ganzhou 341000, P. R.  
China

<sup>c</sup> State Key Laboratory of Rare Earth Resource Utilization, Changchun Institute of  
Applied Chemistry, Chinese Academy of Sciences, Changchun 130022, P. R. China

\* Corresponding author. Fax: +86 431 85698041.

E-mail address: hpyou@ciac.ac.cn (Hongpeng You), dssun@gia.cas.cn (Dashuai Sun)

## Figures and Figure Captions

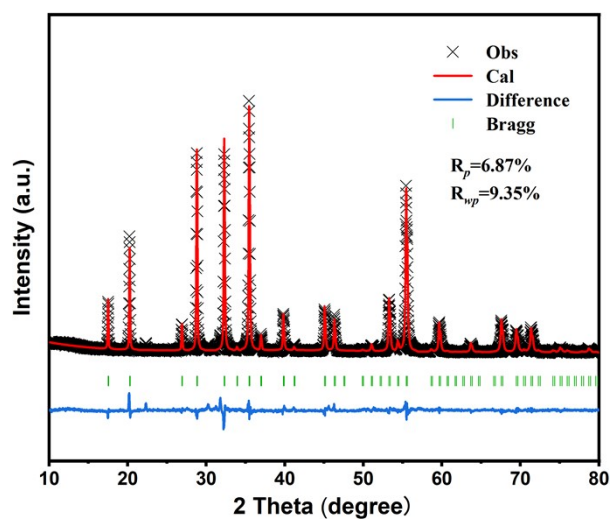

**Fig. S1** Rietveld refinement XRD pattern of undoped YCHSA.

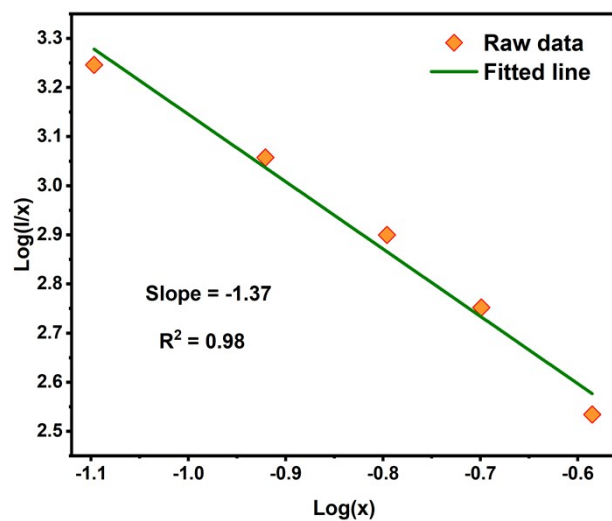

**Fig. S2** Relationship of  $\log(I/x)$  versus  $\log(x)$  in YCHSA: $x\text{Cr}^{3+}$  ( $x = 0.08$  to  $0.34$ ).

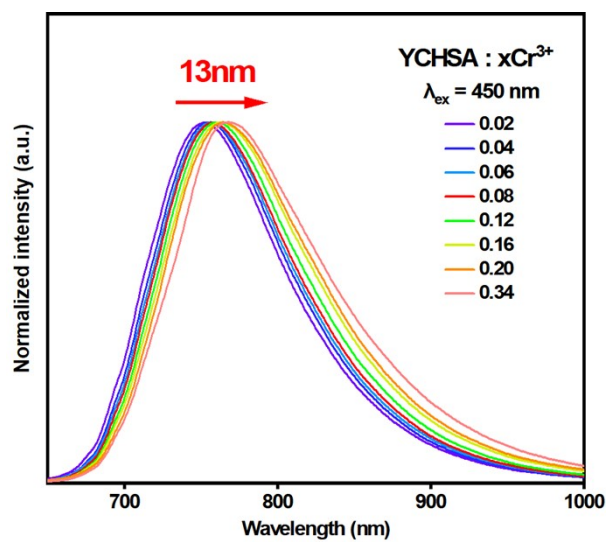

Fig. S3 Normalized PL spectra of YCHSA: $x\text{Cr}^{3+}$  ( $x = 0.02$  to  $0.34$ ).

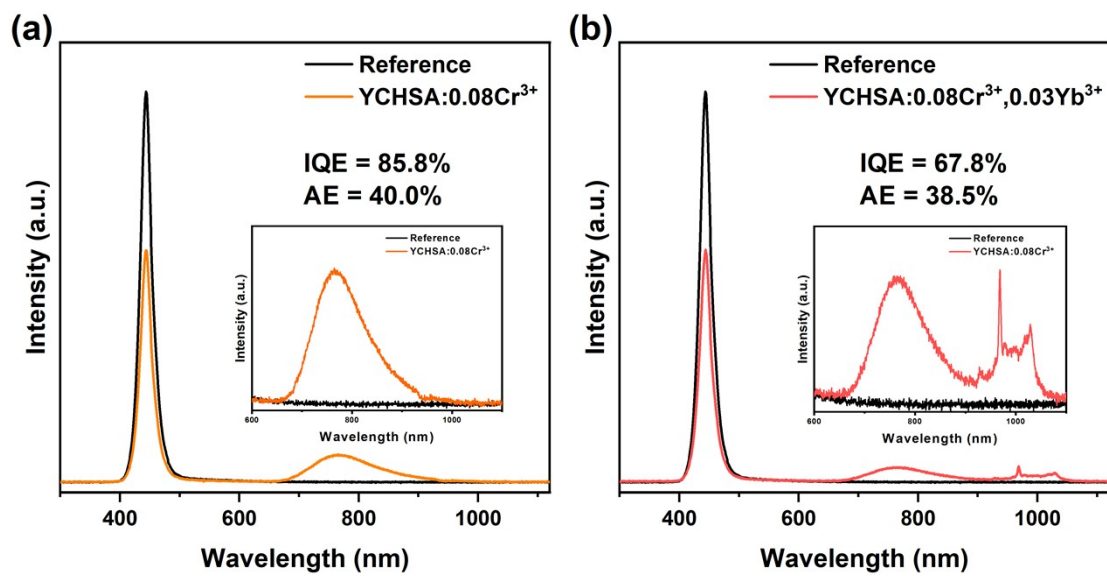

**Fig. S4** The quantum efficiency graphs of YCHSA:0.08Cr<sup>3+</sup> and YCHSA:0.08Cr<sup>3+</sup>,0.03Yb<sup>3+</sup> samples.

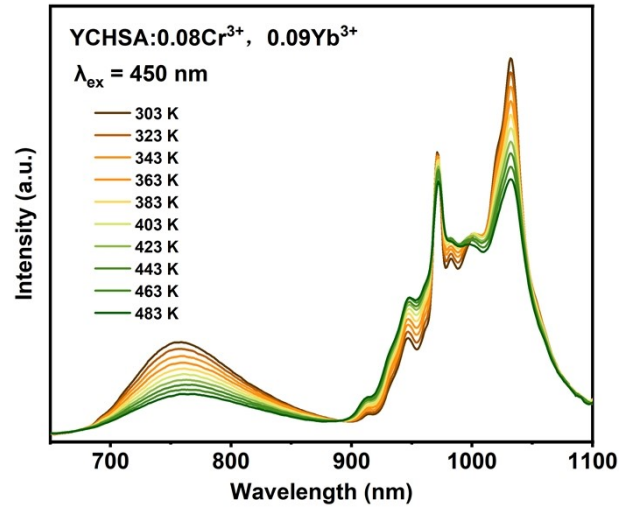

Fig. S5 Temperature-dependent emission spectra of YCHSA:0.08Cr<sup>3+</sup>,0.09Yb<sup>3+</sup>

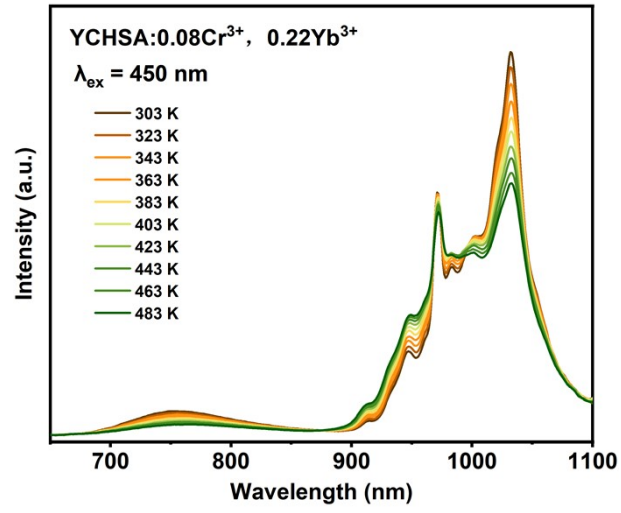

**Fig. S6** Temperature-dependent emission spectra of YCHSA:0.08Cr<sup>3+</sup>,0.22Yb<sup>3+</sup>

## Tables and Table Captions

**Table S1.** Refined Structure Parameters of compound undoped  $\text{Y}_2\text{CaHfScAl}_3\text{O}_{12}$

| atom | site | x       | y       | z       | occ. |
|------|------|---------|---------|---------|------|
| Y1   | 24c  | 0.25    | 0.625   | 0       | 0.66 |
| Ca1  | 24c  | 0.25    | 0.625   | 0       | 0.34 |
| Hf1  | 16a  | 0.25    | 0.75    | 0.25    | 0.5  |
| Sc1  | 16a  | 0.25    | 0.75    | 0.25    | 0.5  |
| Al1  | 24d  | 0.25    | 0.375   | 0       | 1    |
| O1   | 96h  | 0.34527 | 0.46656 | 0.05219 | 1    |

Symmetry, Cubic; space group,  $Ia\bar{3}d$ ;  $a = b = c = 12.3902 \text{ \AA}$ ,  
 $V = 1902.11 \text{ \AA}^3$ ;  $R_{\text{wp}} = 9.35\%$ ,  $R_{\text{p}} = 6.87\%$ ,  $\chi^2 = 3.38$ ;  
 $R_{\text{brag}} = 5.00\%$ ,  $R_{\text{f}} = 4.77\%$



**Table S2.** Refined Structure Parameters of compound  
 $\text{Y}_2\text{CaHfScAl}_3\text{O}_{12}:0.08\text{Cr}^{3+}, 0.03\text{Yb}^{3+}$ .

| atom | site | x       | y       | z       | occ. |
|------|------|---------|---------|---------|------|
| Y1   | 24c  | 0.25    | 0.625   | 0       | 0.63 |
| Ca1  | 24c  | 0.25    | 0.625   | 0       | 0.34 |
| Hf1  | 16a  | 0.25    | 0.75    | 0.25    | 0.5  |
| Sc1  | 16a  | 0.25    | 0.75    | 0.25    | 0.42 |
| Al1  | 24d  | 0.25    | 0.375   | 0       | 1    |
| O1   | 96h  | 0.34527 | 0.46656 | 0.05344 | 1    |
| Cr1  | 16a  | 0.25    | 0.75    | 0.25    | 0.08 |
| Yb1  | 24c  | 0.25    | 0.625   | 0       | 0.03 |

Symmetry, Cubic; space group,  $Ia\bar{3}d$ ;  $a = b = c = 12.3742 \text{ \AA}$ ,  
 $V = 1894.75 \text{ \AA}^3$ ;  $R_{\text{wp}} = 9.68\%$ ,  $R_{\text{p}} = 7.07\%$ ,  $\chi^2 = 3.42$ ,  
 $R_{\text{brag}} = 5.52\%$ ,  $R_{\text{f}} = 5.79\%$

**Table S3.** PL lifetime of Cr<sup>3+</sup> ion in YCHSA:0.08Cr<sup>3+</sup>,yYb<sup>3+</sup> with increasing concentration of Yb<sup>3+</sup> ions.

| y (concentration of Yb <sup>3+</sup> ) | PL lifetime of Cr <sup>3+</sup> (μs) |
|----------------------------------------|--------------------------------------|
| 0                                      | 73.55                                |
| 0.01                                   | 59.98                                |
| 0.03                                   | 50.41                                |
| 0.06                                   | 33.46                                |
| 0.12                                   | 25.14                                |
| 0.16                                   | 22.68                                |

**Table S4.** Energy transfer efficiency in YCHSA:0.08Cr<sup>3+</sup>,yYb<sup>3+</sup> with increasing concentration of Yb<sup>3+</sup> ions.

| y (concentration of Yb <sup>3+</sup> ) | Energy transfer efficiency (%) |
|----------------------------------------|--------------------------------|
| 0                                      | 0                              |
| 0.01                                   | 18.45                          |
| 0.03                                   | 31.46                          |
| 0.06                                   | 54.51                          |
| 0.12                                   | 65.82                          |
| 0.16                                   | 69.16                          |

**Table S5.** Photoelectric conversion efficiency and output power of NIR pc-LED.

| Current (mA) | NIR Efficiency (%) | Total Efficiency (%) | NIR output power (mW) | Total output power (mW) |
|--------------|--------------------|----------------------|-----------------------|-------------------------|
| 10           | 26.128             | 29.685               | 6.893                 | 7.8312                  |
| 20           | 24.67492           | 28.30958             | 13.435                | 15.414                  |
| 40           | 22.88671           | 25.89741             | 25.656                | 29.031                  |
| 60           | 21.12094           | 24.25887             | 36.535                | 41.963                  |
| 80           | 19.8172            | 22.62533             | 46.725                | 53.346                  |
| 100          | 18.59893           | 21.1992              | 55.834                | 63.64                   |
| 120          | 17.37094           | 19.76564             | 63.595                | 72.362                  |
| 140          | 16.21398           | 18.49336             | 70.5                  | 80.411                  |
| 160          | 15.32216           | 17.43126             | 77.239                | 87.871                  |
| 180          | 14.4997            | 16.34928             | 83.482                | 94.131                  |
| 200          | 13.53173           | 15.3646              | 87.737                | 99.621                  |
| 250          | 11.59778           | 13.12985             | 97.085                | 109.91                  |
| 300          | 9.80021            | 11.10897             | 101.54                | 115.1                   |
